# Supplementary material
Source: PubMed Central journal article supplement (PMC6828553)

SUPPLEMENTARY DATA

**Supplementary Table 1.** Cohort recruitment and data collection methods summary

|                        | <b>GoDarts</b>                                                                                                                                  | <b>DCS</b>                                                                                                                                                                                      | <b>DARE</b>                                                                                                                | <b>PRIBA</b>                                                                                                                         | <b>MRC Progressor</b>                                                                                                                                                                                                |
|------------------------|-------------------------------------------------------------------------------------------------------------------------------------------------|-------------------------------------------------------------------------------------------------------------------------------------------------------------------------------------------------|----------------------------------------------------------------------------------------------------------------------------|--------------------------------------------------------------------------------------------------------------------------------------|----------------------------------------------------------------------------------------------------------------------------------------------------------------------------------------------------------------------|
| Included participants  | 3963                                                                                                                                            | 1942                                                                                                                                                                                            | 1917                                                                                                                       | 574                                                                                                                                  | 212                                                                                                                                                                                                                  |
| Data collection period | From 1998                                                                                                                                       | From 1998                                                                                                                                                                                       | 2007 to 2017                                                                                                               | 2011 to 2013                                                                                                                         | 2013 to 2015                                                                                                                                                                                                         |
| Study design           | Longitudinal                                                                                                                                    | Longitudinal                                                                                                                                                                                    | Cross sectional                                                                                                            | Longitudinal                                                                                                                         | Cross sectional                                                                                                                                                                                                      |
| Setting                | Primary and secondary care in Tayside, Scotland                                                                                                 | Primary and secondary care in West-Friesland, Netherlands                                                                                                                                       | Primary and secondary care in eight diabetes research regions, England and retinal screening clinics.                      | Primary and secondary care in South West England                                                                                     | Primary and secondary care in Exeter, Dundee and Oxford, England                                                                                                                                                     |
| Inclusion criteria     | Clinical diagnosis of type 2 diabetes.                                                                                                          | Clinical diagnosis of type 2 diabetes.                                                                                                                                                          | Clinical diagnosis of diabetes (any type).                                                                                 | Clinical diagnosis of type 2 diabetes. Clinician determined requirement for DPP-IV inhibitor or GLP-1 analogue (HbA1C >7.5%)         | Clinical diagnosis of type 2 diabetes non-insulin treated within 6 months of diagnosis. Participants were selected on the basis of rapid or slow progression to insulin therapy (<7, >7 years). Age 18-90 inclusive. |
| Data collection        | Clinical measurements and blood collected at initial visit. Follow up clinical data constantly updated using electronic medical record linkage. | Clinical measurements collected at initial visit, and repeated annually. Blood collected at one of the annual visits. Additional health data collected using electronic medical record linkage. | Clinical measurements and blood sample collected at visit. Ongoing biochemical data collected from pathology laboratories. | Clinical measurements and blood taken at initial visit. Follow up clinical measurements and blood collected at three and six months. | Clinical measures and fasting blood sample taken at visit.                                                                                                                                                           |

SUPPLEMENTARY DATA

**Supplementary Figure 1.** Participant flow diagram \* identified through search of electronic laboratory records.

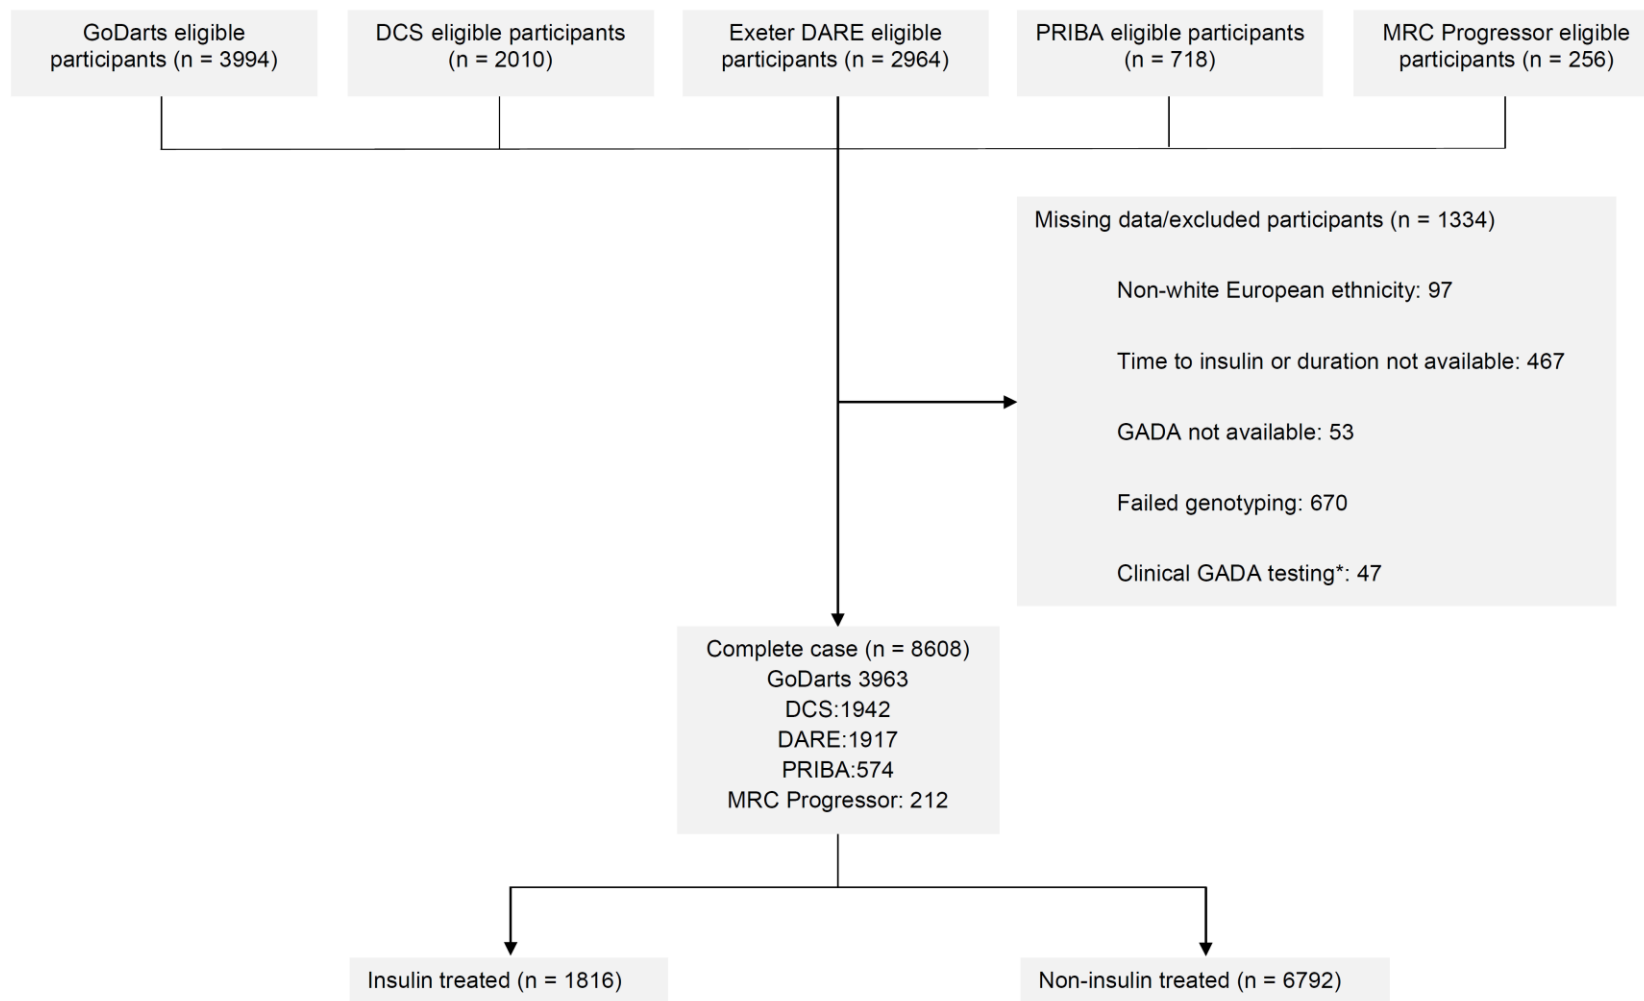

SUPPLEMENTARY DATA

**Supplementary Table 2.** Type 1 diabetes SNPs included in the genetic risk score with weights. Effect allele is the risk increasing allele on the positive strand.

| C                       | Gene        | Odds Ratio | Weight | Effect Allele |
|-------------------------|-------------|------------|--------|---------------|
| rs2187668,<br>rs7454108 | DR3/DR4     | 48.18      | 3.87   |               |
|                         | DR3/DR3     | 21.12      | 3.05   |               |
|                         | DR4/DR4     | 21.98      | 3.09   |               |
|                         | DR4/X       | 7.03       | 1.95   |               |
|                         | DR3/X       | 4.53       | 1.51   |               |
| rs1264813               | HLA_A_24    | 1.54       | 0.43   | T             |
| rs2395029               | HLA_B_5701  | 2.5        | 0.92   | T             |
| rs3129889               | HLA_DRB1_15 | 14.88      | 2.70   | A             |
| rs2476601               | PTPN22      | 1.96       | 0.67   | A             |
| rs689                   | INS         | 1.75       | 0.56   | T             |
| rs12722495              | IL2RA       | 1.58       | 0.46   | T             |
| rs2292239               | ERBB3       | 1.35       | 0.30   | T             |
| rs10509540              | C10orf59    | 1.33       | 0.29   | T             |
| rs4948088               | COBL        | 1.3        | 0.26   | C             |
| rs7202877               |             | 1.28       | 0.25   | G             |
| rs12708716              | CLEC16A     | 1.23       | 0.21   | A             |
| rs3087243               | CTLA4       | 1.22       | 0.20   | G             |
| rs1893217               | PTPN2       | 1.2        | 0.18   | G             |
| rs11594656              | IL2RA       | 1.19       | 0.17   | T             |
| rs3024505               | IL10        | 1.19       | 0.17   | G             |
| rs9388489               | C6orf173    | 1.17       | 0.16   | G             |
| rs1465788               |             | 1.16       | 0.15   | C             |
| rs1990760               | IFIH1       | 1.16       | 0.15   | T             |
| rs3825932               | CTSH        | 1.16       | 0.15   | C             |
| rs425105                |             | 1.16       | 0.15   | T             |
| rs763361                | CD226       | 1.16       | 0.15   | T             |
| rs4788084               | IL27        | 1.16       | 0.15   | C             |
| rs17574546              |             | 1.14       | 0.13   | C             |
| rs11755527              | BACH2       | 1.13       | 0.12   | G             |
| rs3788013               | UBASH3A     | 1.13       | 0.12   | A             |
| rs2069762               | IL2         | 1.12       | 0.11   | A             |
| rs2281808               |             | 1.11       | 0.10   | C             |
| rs5753037               |             | 1.1        | 0.10   | T             |

SUPPLEMENTARY DATA

**Supplementary Table 1.** Type 1 diabetes SNPs included in the 10 SNP T1D GRS

| SNP                     | Gene        | Odds Ratio | Weight | Effect Allele |
|-------------------------|-------------|------------|--------|---------------|
| rs2187668,<br>rs7454108 | DR3/DR4     | 48.18      | 3.87   |               |
|                         | DR3/DR3     | 21.12      | 3.05   |               |
|                         | DR4/DR4     | 21.98      | 3.09   |               |
|                         | DR4/X       | 7.03       | 1.95   |               |
|                         | DR3/X       | 4.53       | 1.51   |               |
| rs1264813               | HLA_A_24    | 1.54       | 0.43   | T             |
| rs2395029               | HLA_B_5701  | 2.5        | 0.92   | T             |
| rs3129889               | HLA_DRB1_15 | 14.88      | 2.70   | A             |
| rs2476601               | PTPN22      | 1.96       | 0.67   | A             |
| rs689                   | INS         | 1.75       | 0.56   | T             |
| rs12722495              | IL2RA       | 1.58       | 0.46   | T             |
| rs2292239               | ERBB3       | 1.35       | 0.30   | T             |
| rs10509540              | C10orf59    | 1.33       | 0.29   | T             |

SUPPLEMENTARY DATA

**Supplementary Table 2.** Participant characteristics stratified by cohort. Median (IQR) or %  
 Kruskal-Wallis used for comparison testing continuous variables, chi-square for categorical variables  
 Exeter cohorts are shown combined due to low numbers in PRIBA and MRC Progressor

|                                      | <i>DCS Hoorn</i><br>( <i>n</i> = 1 942) | <i>GoDarts</i><br>( <i>n</i> = 3 963) | <i>Exeter studies</i><br>( <i>n</i> = 2 702 ) | <i>p-value</i> |
|--------------------------------------|-----------------------------------------|---------------------------------------|-----------------------------------------------|----------------|
| Sex (% Male)                         | 54.6%                                   | 54.8%                                 | 60.2%                                         | <0.001         |
| Age at diagnosis (years)             | 60 (53, 67)                             | 61 (54, 68)                           | 59 (50, 67)                                   | <0.001         |
| BMI (kg/m <sup>2</sup> )*            | 29.5 (26.8, 33.2)                       | 30.4 (27.2, 34.6)                     | 31.1 (27.5, 35.7)                             | <0.001         |
| Duration of diabetes (years) †       | 7.1 (4.3, 11.0)                         | 12.8 (10.3, 15.7)                     | 7.0 (3.0, 12.3)                               | <0.001         |
| Duration of diabetes (years) at GADA | 8.2 (5.3, 12.2)                         | 5.1 (2.7, 8.0)                        | 7.0 (3.0, 12.0)                               | <0.001         |
| Insulin treated within 5 years (%)‡  | 5.8                                     | 7.4                                   | 10.2                                          | <0.001         |
| HbA1c (%)†                           | 6.5 (6.1, 7.1)                          | 7.2 (6.5, 8.2)                        | 7.3 (6.6, 8.4)                                | <0.001         |
| HbA1c (mmol/mol) †                   | 48 (43, 54)                             | 55 (48, 66)                           | 56 (49, 68)                                   | <0.001         |
| GADA Positive (%)                    | 2.2%                                    | 3.9%                                  | 3.1%                                          | <0.001         |
| T1D GRS centile§                     | 4.7 (0.9, 16.1)                         | 3.9 (0.5, 15.9)                       | 4.2 (0.7, 16.3)                               | <0.001         |

\* Closest to diagnosis

† At latest follow up

‡ Percentage of participants observed for at least five years

§ Centile of participants with type 1 diabetes from the Wellcome trust case control consortium.

SUPPLEMENTARY DATA

**Supplementary Figure 2.** Kaplan-Meier plot of probability of requiring insulin therapy by risk group using 10 SNP T1D GRS. Solid lines represent GADA positive groups, dashed lines represent GADA negative groups. Blue = low T1D GRS centile, orange = medium T1D GRS centile, red = high T1D GRS centile.

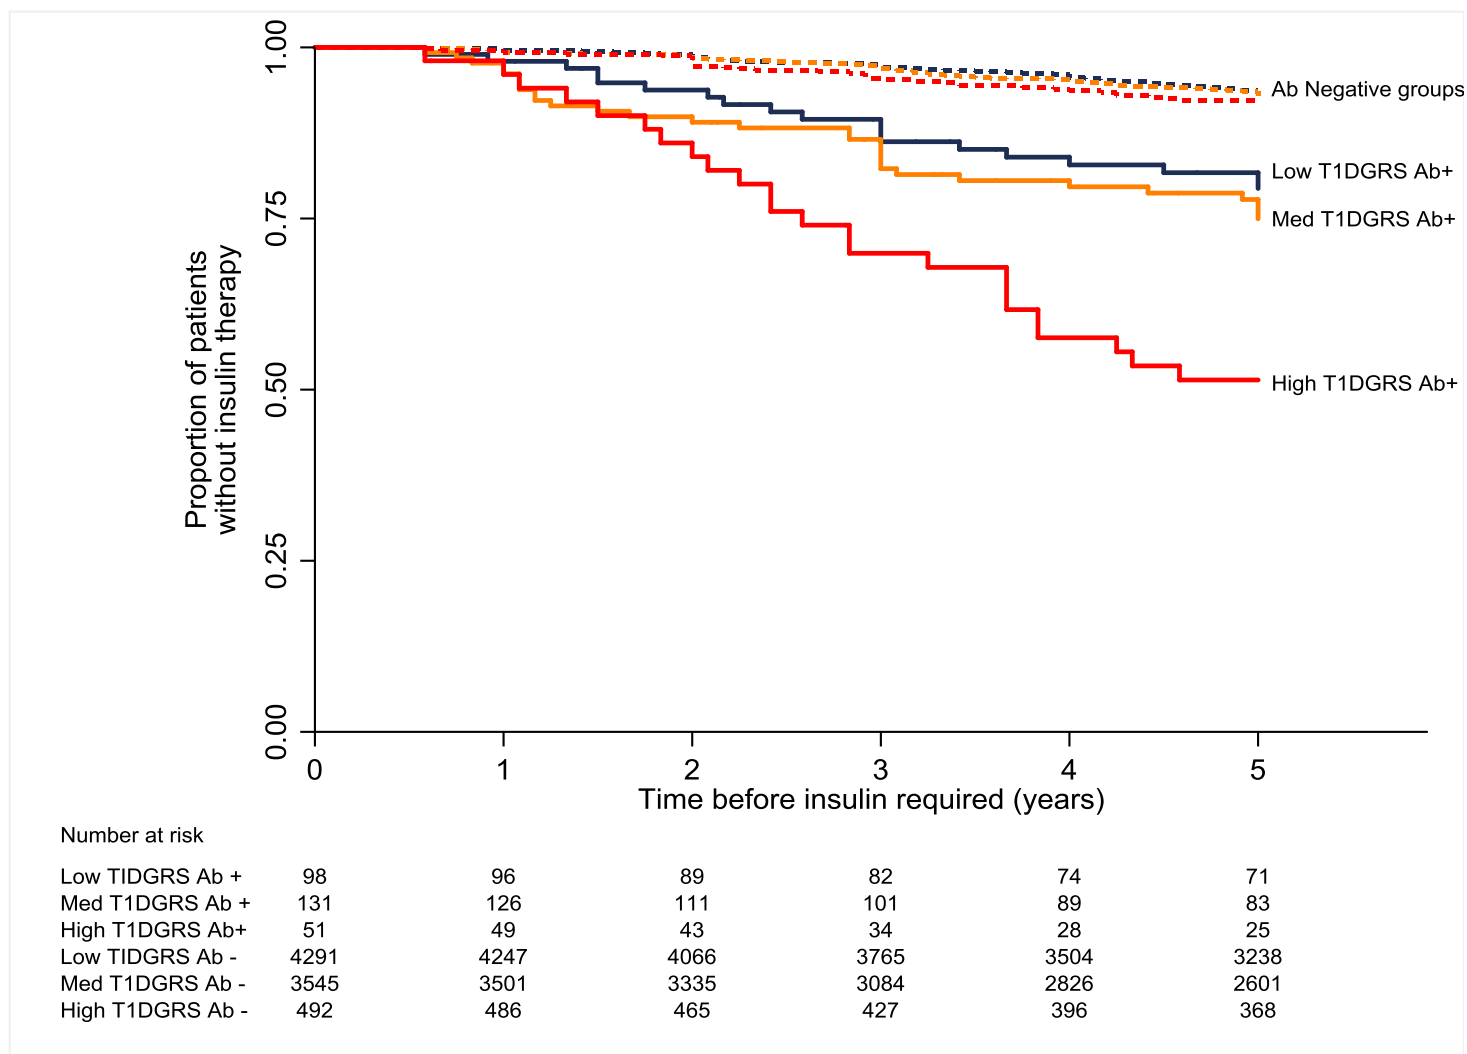

SUPPLEMENTARY DATA

**Supplementary Table 3.** Hazard ratios from Cox proportional regression model for time to insulin censored at 5 years (10 SNP T1D GRS)

\* Closest to diagnosis

| Variable                                                  | Hazard Ratio (95% CI) | p value |
|-----------------------------------------------------------|-----------------------|---------|
| GADA Negative                                             | 1                     |         |
| GADA Positive                                             | 3.70 (2.74, 4.99)     | <0.001  |
| GADA Negative:10 SNP T1D GRS (per 1 SD change in T1D GRS) | 1.04 (0.96, 1.14)     | >0.1    |
| GADA Positive:10 SNP T1D GRS (per 1 SD change in T1D GRS) | 1.34 (1.05, 1.71)     | 0.02    |
| Age at diagnosis (per 1 year)                             | 0.97 (0.96, 0.98)     | <0.001  |
| BMI (per kg/m <sup>2</sup> unit)                          | 1.00 (0.98, 1.01)     | >0.1    |

SUPPLEMENTARY DATA

**Supplementary Figure 3.** Kaplan-Meier plot of probability of requiring insulin therapy by risk group using HLA DR3/DR4 alleles.

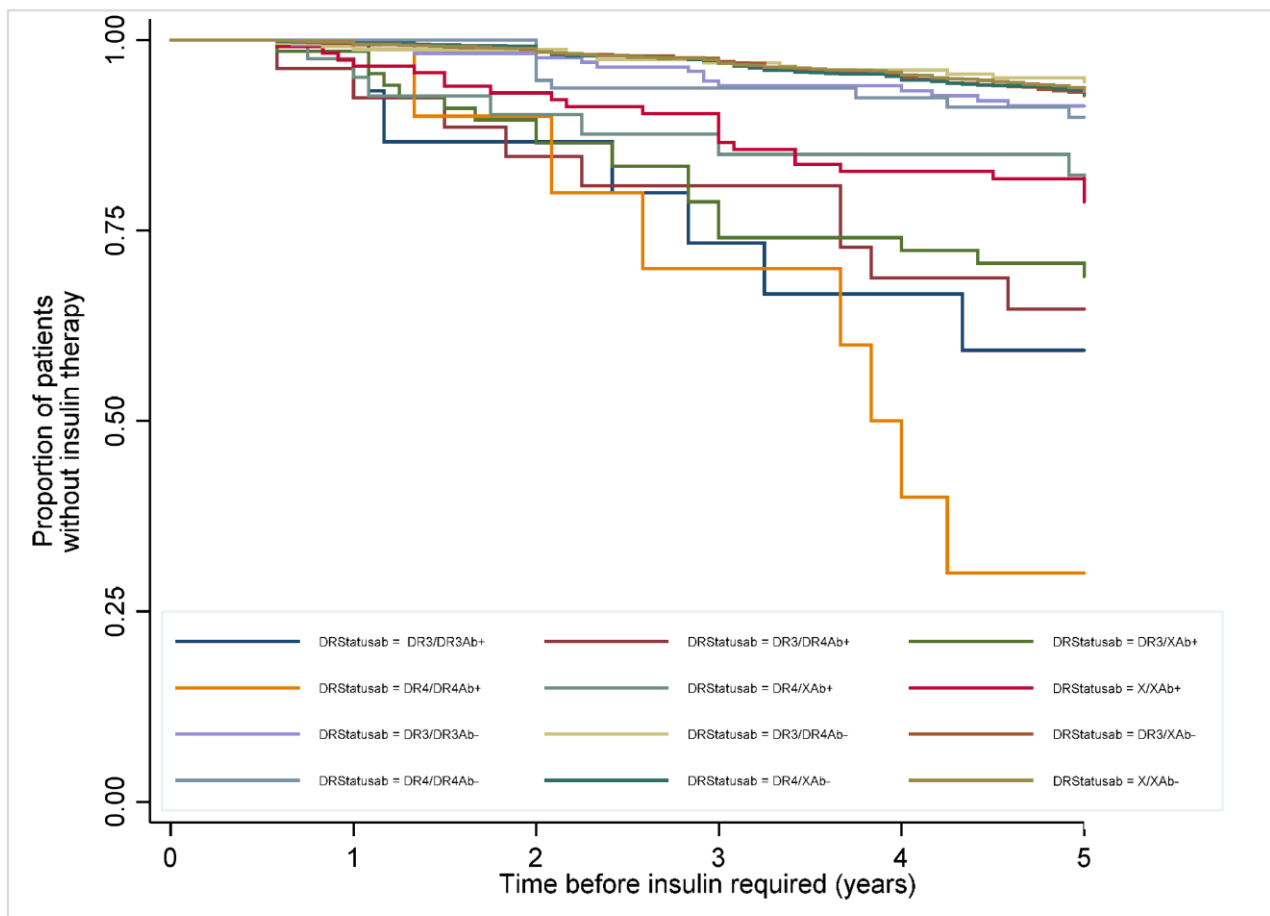

Number at risk

|                |     |     |     |    |    |    |
|----------------|-----|-----|-----|----|----|----|
| No Copies Ab+  | 15  | 15  | 13  | 11 | 9  | 8  |
| One Copy Ab+   | 27  | 25  | 22  | 20 | 17 | 16 |
| Two Copies Ab+ | 69  | 67  | 59  | 50 | 45 | 40 |
| No Copies Ab-  | 10  | 10  | 9   | 7  | 5  | 3  |
| One Copy Ab-   | 42  | 40  | 36  | 33 | 31 | 30 |
| Two Copies Ab- | 117 | 114 | 104 | 96 | 84 | 82 |



SUPPLEMENTARY DATA

**Supplementary Figure 4.** Kaplan-Meier plot of probability of requiring insulin therapy by risk group using HLA DR3/DR4 alleles. Solid lines represent GADA positive groups, dashed lines represent GADA negative groups. Blue = No DR3/DR4 copies, orange = one DR3/DR4 copy, red = two DR3/DR4 copies.

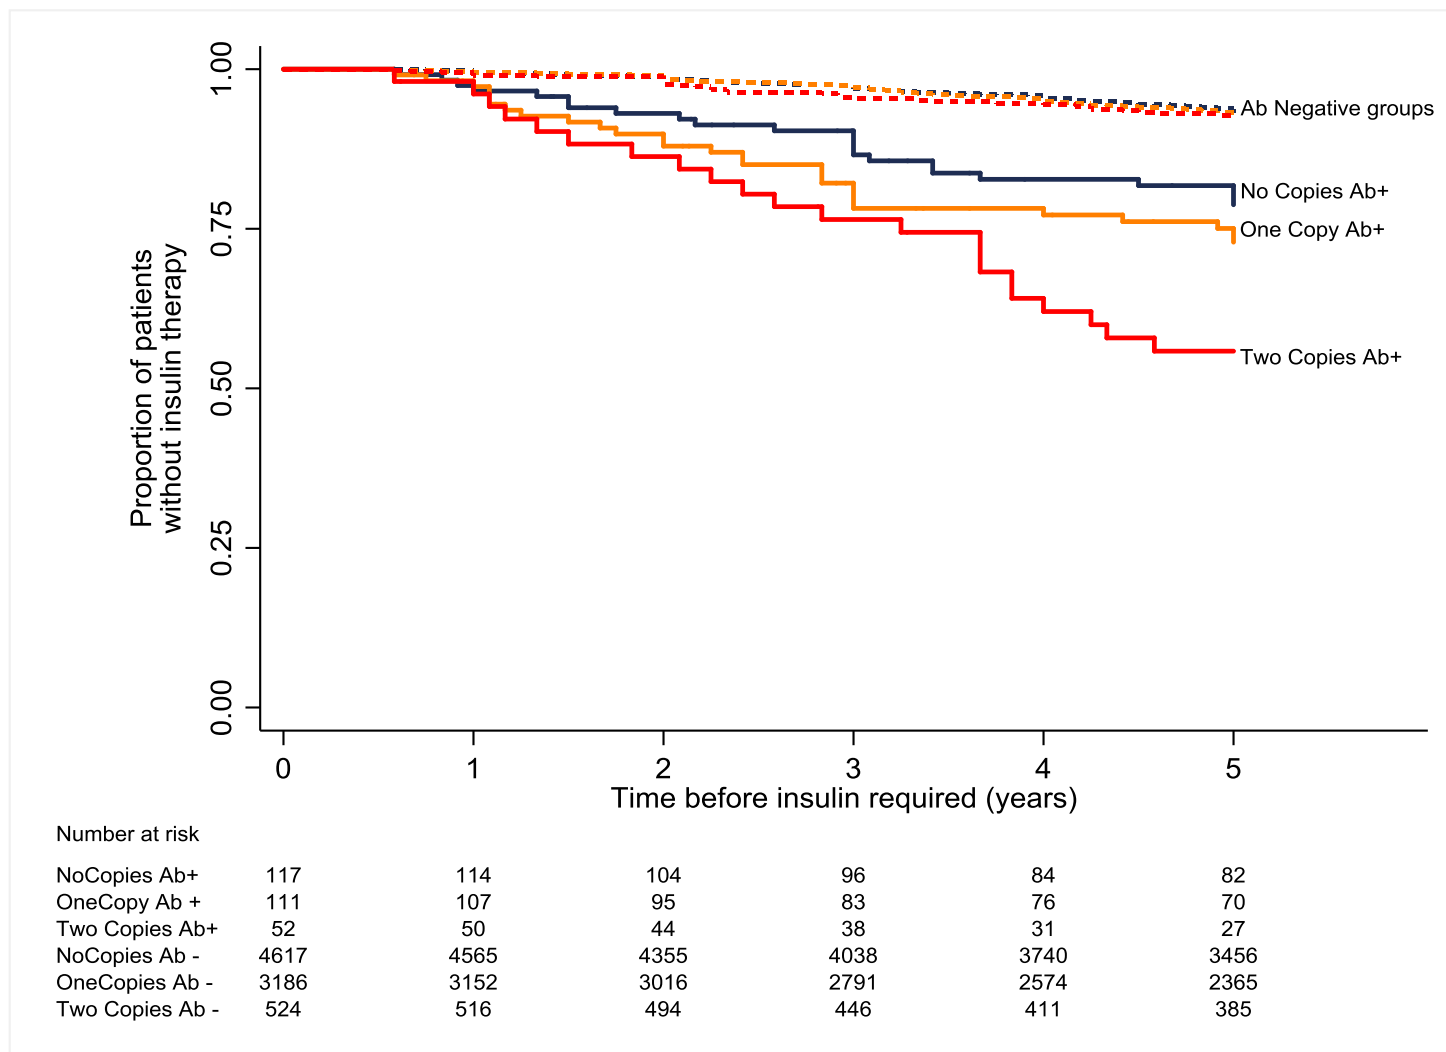

Supplement: EMS83631-supplement-Supplementary_data.pdf [file EMS83631-supplement-Supplementary_data.pdf]
